# Supplementary material for: Graphene oxide–chitosan composite hydrogels as broad-spectrum adsorbents for water purification
Source: Royal Society of Chemistry journal article supplement (doi:10.1039/c2ta00406b), 2012-11-26
Supplement: c2ta00406b.pdf [file c2ta00406b.pdf]

Electronic Supplementary Information

## **Graphene oxide/chitosan composite hydrogels as broad-spectrum adsorbents for water purification**

Yunqiang Chen, Libin Chen, Hua Bai\* and Lei Li\*

College of Materials, Xiamen University, Xiamen, 361005, P. R. China. E-mail:

baihua@xmu.edu.cn, lilei@xmu.edu.cn

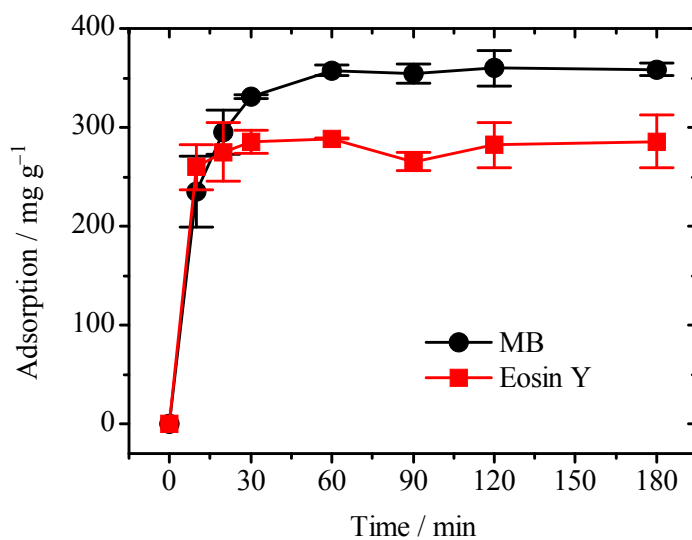

Fig. S1. Time-dependent adsorption of MB and Eosin Y on comminuted GO/CS10 hydrogel under agitation.

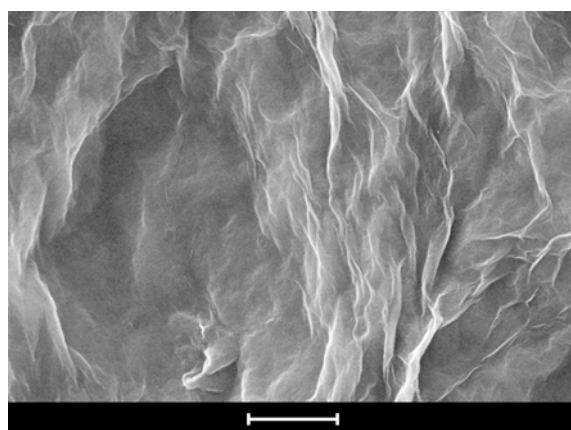

Fig. S2. SEM image of compact GO/CS composite prepared by drying GO/CS10 hydrogel in air.

Scale bar: 5  $\mu\text{m}$ .

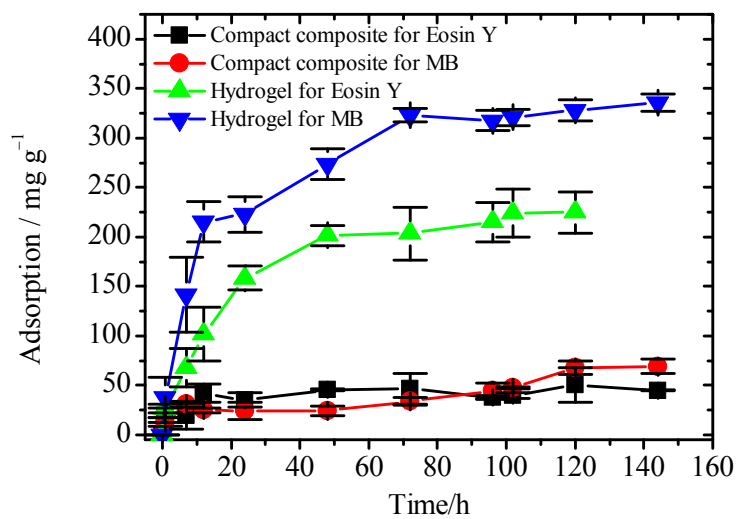

Fig. S3. Time-dependent adsorption of Eosin Y and MB on GO/CS10 hydrogel and corresponding compact composite.

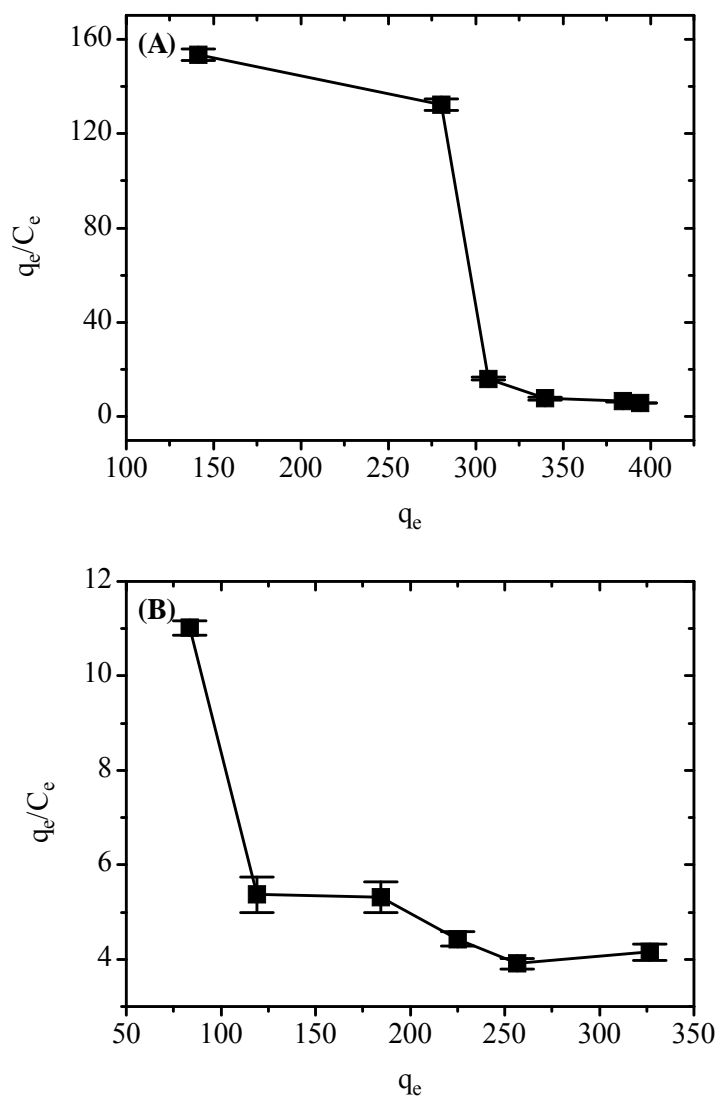

Fig. S4. Analysis of adsorption data of MB (A) and Eosin Y (B) on GO/CS with Langmuir Function.

The Langmuir isotherm can be expressed as

$$q_e = \frac{aq_s C_e}{1 + aC_e}$$

where  $q_s$  is the maximum adsorption capacity and  $a$  is a constant. This equation can be expressed in linear form:

$$\frac{q_e}{C_e} = aq_s - aq_e$$

The plots of  $q_e/C_e$  to  $q_e$  are nonlinear for both dyes, indicating the isotherms are not of Langmuir type.

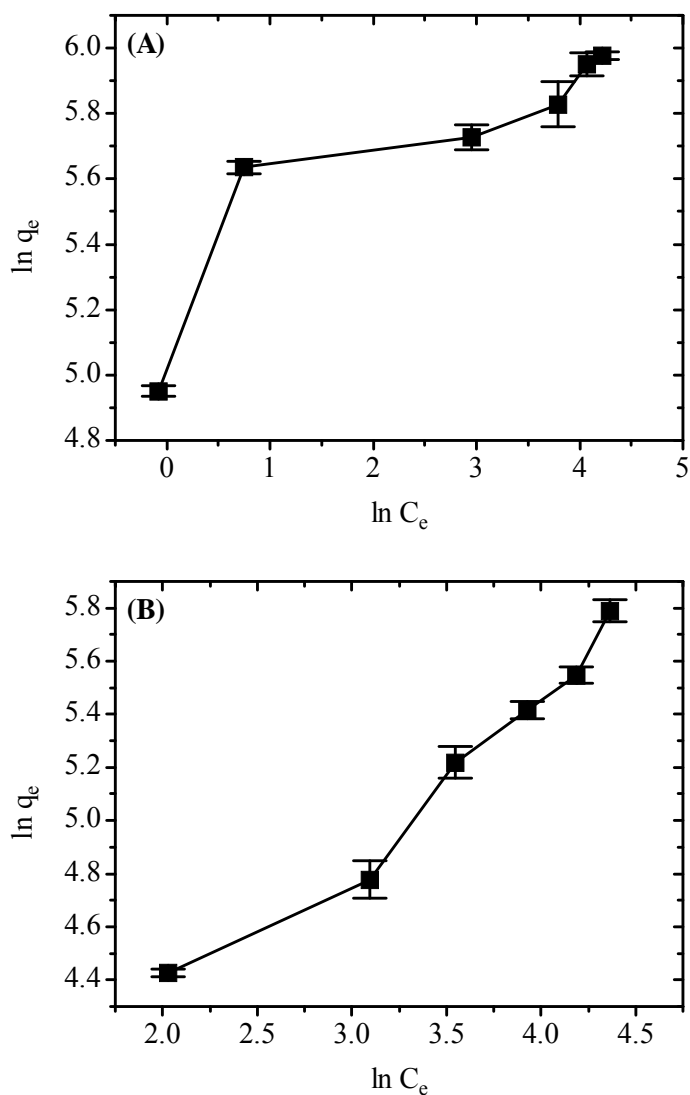

Fig. S5. Analysis of adsorption data of MB (A) and Eosin Y (B) on GO/CS with Freundlich Function.

The Freundlich isotherm can be expressed as

$$q_e = KC_e^{\frac{1}{n}}$$

where  $K$  and  $n$  are constants. This equation can be expressed in linear form:

$$\ln q_e = \ln K + \frac{1}{n} \ln C_e$$

The plots of  $\ln q_e$  to  $\ln C_e$  are nonlinear for both dyes, indicating the isotherms are not of Freundlich type.

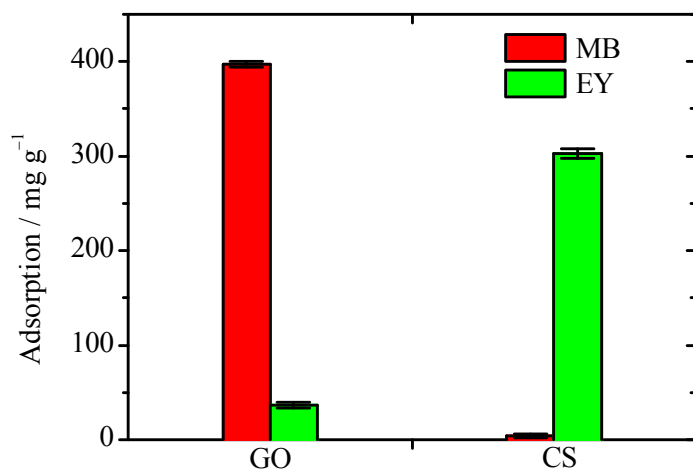

Fig. S6. Adsorption of MB and Eosin Y on pure GO and CS. The initial concentration of the dyes is  $80 \text{ mg L}^{-1}$ .

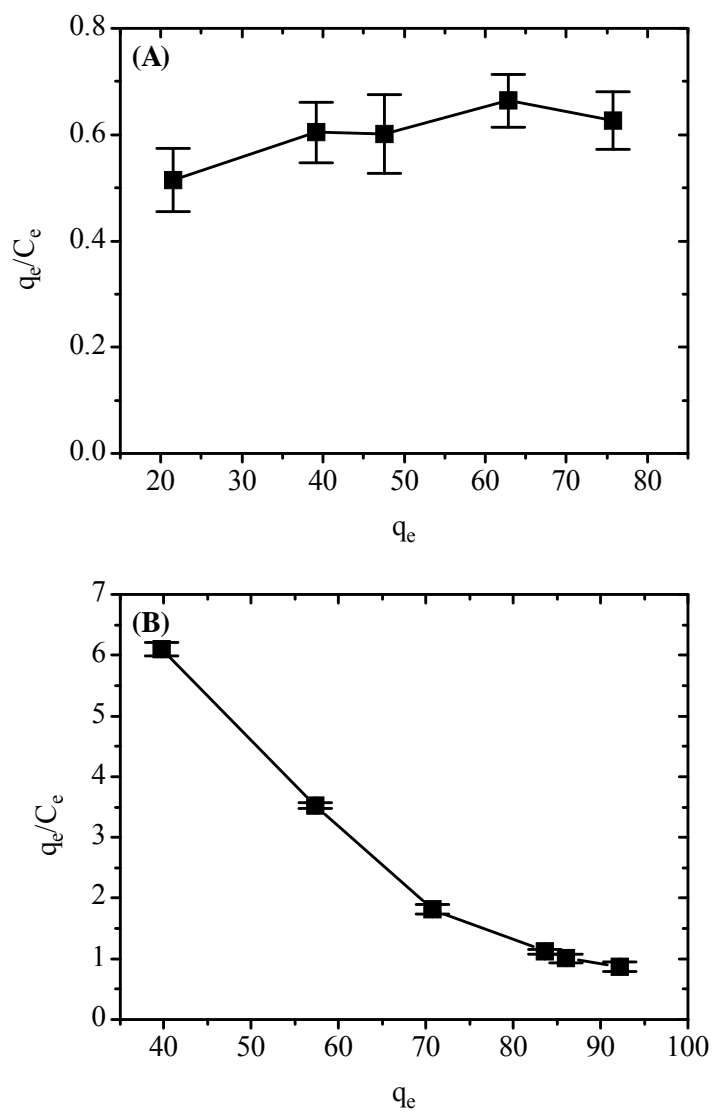

Fig. S7. Analysis of adsorption data of Cu(II) (A) and Pb(II) (B) on GO/CS with Langmuir Function.

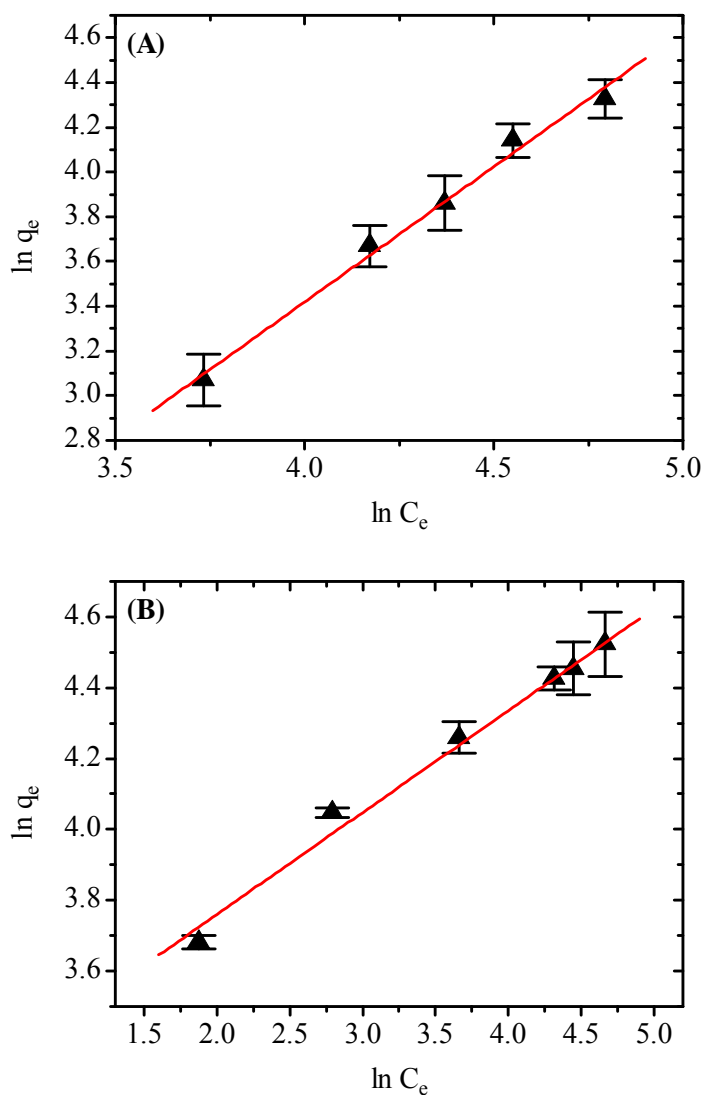

Fig. S8. Analysis of adsorption data of Cu(II) (A) and Pb(II) (B) on GO/CS with Freundlich Function.

For Cu(II):

Fitting of the data gives  $\ln q_e = -1.42 + 1.21 \ln C_e$  with  $r^2 = 0.99$ , thus  $K = 0.24$  and  $n = 0.826$ .

For: Pb(II)

Fitting of the data gives  $\ln q_e = 3.19 + 0.29 \ln C_e$  with  $r^2 = 0.99$ , thus  $K = 24.3$  and  $n = 3.45$ .

$n$  value for Cu(II) is much lower than that for Pb(II), indicating that the affinity of GO/CS10 hydrogel to Cu(II) is smaller than to Pb(II).
